# Supplementary material for: Determination of perfluorooctanoic acid (PFOA) extractable from the surface of commercial cookware under simulated cooking conditions by LC/MS/MS
Source: Royal Society of Chemistry journal article supplement (doi:10.1039/b505377c), 2005-01-01
Supplement: b505377c.doc [file b505377c.doc]

**Supplementary** **data**

Determination of perfluorooctanoic acid (PFOA) extractable from the surface of commercial cookware under simulated cooking conditions by LC/MS/MS

Charles R. Powley,*a** Michael J. Michalczyk,*b* and Mary A. Kaiser*c*

a Haskell Laboratory, E.I. du Pont de Nemours and Company, P. O. Box 50, Newark, DE 19714-0050 USA. Fax:302-366-5003; Tel: 302-451-4502; E-mail: [Chuck.Powley@usa.dupont.com](mailto:Chuck.Powley@usa.dupont.com)

**b** DuPont Fluoroproducts, Chestnut Run Plaza 711, P.O. Box 80711 Wilmington, DE 19880-0711.

c DuPont Corporate Center for Analytical Sciences, Experimental Station 402/5321, P.O. Box 80402, Wilmington, DE 19880-0402

**Table 1** Detailedrecovery data obtained during water extractions

| Fortification type | Fortification level/pg cm-2 | Recovery/% |
| --- | --- | --- |
| To surface of aluminium pan | 400  400  400  400 | 88  88  85  92 |
| To extracts prior to SPE cleanup |  |  |
| 376603-1 Stainless steel control #1, 1st aliquot | 2000 | 122 |
| 376603-2 Stainless steel control #1, 2nd aliquot | 2000 | 116 |
| 376606-1 Stainless steel control #2, 1st aliquot | 2000 | 109 |
| 376606-2 Stainless steel control #2, 2nd aliquot | 2000 | 116 |
| 376609-1 Stainless steel control #3, 1st aliquot | 2000 | 101 |
| 376609-2 Stainless steel control #3, 2nd aliquot | 2000 | 130 |
| 376612-1 Stainless steel control #4, 1st aliquot | 2000 | 107 |
| 376612-2 Stainless steel control #4, 2nd aliquot | 2000 | 108 |
| 376615-1 Stainless steel control #5, 1st aliquot | 2000 | 111 |
| 376615-2 Stainless steel control #5, 2nd aliquot | 2000 | 106 |
| 376616 Deionized water control | 2000 | 104 |
| 610030 Stainless steel control #1, 1st aliquot | 2000 | 103 |
| 610035 Stainless steel control #1, 2nd aliquot | 2000 | 110 |
| 610060 Coated aluminum #1, 1st aliquot | 2000 | 106 |
| 610065 Coated aluminum #1, 2nd aliquot | 2000 | 102 |
| 610090 Coated aluminum #2, 1st aliquot | 2000 | 112 |
| 610095 Coated aluminum #2, 2nd aliquot | 2000 | 110 |
| 610120 Coated aluminum #3, 1st aliquot | 2000 | 108 |
| 610125 Coated aluminum #3, 2nd aliquot | 2000 | 108 |
| 610150 Stainless steel control #2, 1st aliquot | 2000 | 105 |
| 610155 Stainless steel control #2, 2nd aliquot | 2000 | 104 |
| 611030 Stainless steel control #3, 1st aliquot | 2000 | 111 |
| 611035 Stainless steel control #3, 2nd aliquot | 2000 | 104 |
| 611060 Coated aluminum #4, 1st aliquot | 2000 | 109 |
| 615030 Stainless steel control #4, 1st aliquot | 2000 | 77 |
| 615035 Stainless steel control #4, 2nd aliquot | 2000 | 72 |
| 615060 Coated aluminum #5, 1st aliquot | 2000 | 104 |
| 615065 Coated aluminum #5, 2nd aliquot | 2000 | 72 |
| 615090 Stainless steel control #5, 1st aliquot | 2000 | 78 |
| 615095 Stainless steel control #5, 2nd aliquot | 2000 | 102 |
| 615120 Coated aluminum #6, 1st aliquot | 2000 | 110 |
| 615125 Coated aluminum #6, 2nd aliquot | 2000 | 108 |
| 615150 Stainless steel control #1, 1st aliquot | 2000 | 74 |
| 615155 Stainless steel control #2, 2nd aliquot | 2000 | 103 |
| 615160 Deionized water control | 2000 | 88 |

**Table 2** Detailedrecovery data obtained during ethanol/water extractions

| Fortification type | Fortification level/pg cm-2 | Recovery/% |
| --- | --- | --- |
| To surface of aluminium pana | 100  100  100  100  1000  1000  1000  1000 | 90  118  88  90  88  87  89  83 |
| To surface of anodized aluminium pana | 100  100  100  100  1000  1000  1000  1000 | 108  118  86  89  78  99  85  81 |
| To aliquot of stainless steel pan extracta | 100  100  100  100  1000  1000 | 80  89  109  108  97  95 |
| To sand in ASE cella | 1000  1000  1000  1000 | 91  94  108  101 |
| a results combined for 1:9 and 19:1 ethanol/water extractions | | |

**Table 3** Results of analysis of water extractions at 100C

| Sample identification | PFOA/ng L-1 |
| --- | --- |
| 376603-1 Stainless steel control #1, 1st aliquot | nda |
| 376603-2 Stainless steel control #1, 2nd aliquot | nda |
| 376606-1 Stainless steel control #2, 1st aliquot | 37 |
| 376606-2 Stainless steel control #2, 2nd aliquot | nda |
| 376609-1 Stainless steel control #3, 1st aliquot | 49 |
| 376609-2 Stainless steel control #3, 2nd aliquot | nda |
| 376612-1 Stainless steel control #4, 1st aliquot | nda |
| 376612-2 Stainless steel control #4, 2nd aliquot | nda |
| 376615-1 Stainless steel control #5, 1st aliquot | nda |
| 376615-2 Stainless steel control #5, 2nd aliquot | nda |
| 376616 Deionized water control | nda |
| 610030 Stainless steel control #1, 1st aliquot | nda |
| 610035 Stainless steel control #1, 2nd aliquot | nda |
| 610060 Coated aluminum #1, 1st aliquot | nda |
| 610065 Coated aluminum #1, 2nd aliquot | nda |
| 610090 Coated aluminum #2, 1st aliquot | nda |
| 610095 Coated aluminum #2, 2nd aliquot | nda |
| 610120 Coated aluminum #3, 1st aliquot | nda |
| 610125 Coated aluminum #3, 2nd aliquot | nda |
| 610150 Stainless steel control #2, 1st aliquot | nda |
| 610155 Stainless steel control #2, 2nd aliquot | nda |
| 611030 Stainless steel control #3, 1st aliquot | 223 |
| 611035 Stainless steel control #3, 2nd aliquot | 140 |
| 611060 Coated aluminum #4, 1st aliquot | nda |
| 615030 Stainless steel control #4, 1st aliquot | nda |
| 615035 Stainless steel control #4, 2nd aliquot | nda |
| 615060 Coated aluminum #5, 1st aliquot | nda |
| 615065 Coated aluminum #5, 2nd aliquot | nda |
| 615090 Stainless steel control #5, 1st aliquot | nda |
| 615095 Stainless steel control #5, 2nd aliquot | nda |
| 615120 Coated aluminum #6, 1st aliquot | nda |
| 615125 Coated aluminum #6, 2nd aliquot | nda |
| 615150 Stainless steel control #1, 1st aliquot | nda |
| 615155 Stainless steel control #2, 2nd aliquot | nda |
| 615160 Deionized water control | nda |
| 611160 Deionized water control | nda |
| anot detected, detection limit is approx. 10 ppt, quantification limit is 50 ppt | |

**Table 4** Results of analysis of ethanol/water extractions at 125C

| Solvent system | Sample identification | PFOA/pg cm-2 |
| --- | --- | --- |
| 1:9 ethanol/water | Coated aluminum #1 first extraction | nda |
|  | Coated aluminum #1 second extraction | nda |
|  | Coated aluminum #1 third extraction | nda |
|  | Coated aluminum #2 | nda |
|  | Coated aluminum #3 | nda |
|  | Coated aluminum #3 abraided | nda |
|  | Coated aluminum #4 | nda |
|  | Coated aluminum #4 first extraction, 90 min | nda |
|  | Coated aluminum #4 second extraction, 90 min | nda |
|  | Coated aluminum #4 third extraction, 90 min | nda |
|  | Coated aluminum #5 | nda |
|  |  |  |
|  | Coated anodized aluminum #1 first extraction | nda |
|  | Coated anodized aluminum #1 second extraction | nda |
|  | Coated anodized aluminum #1 third extraction | nda |
|  | Coated anodized aluminum #2 | nda |
|  | Coated anodized aluminum #3 | nda |
|  | Coated anodized aluminum #3 abraided | nda |
|  | Coated anodized aluminum #4 | nda |
|  | Coated anodized aluminum #4 first extraction, 90 min | nda |
|  | Coated anodized aluminum #4 second extraction, 90 min | nda |
|  | Coated anodized aluminum #4 third extraction, 90 min | nda |
|  | Coated anodized aluminum #5 | nda |
|  |  |  |
|  | Stainless steel control #1 | nda |
|  |  |  |
| 19:1 ethanol/water | Coated aluminum #1 first extraction | nda |
|  | Coated aluminum #1 second extraction | nda |
|  | Coated aluminum #1 third extraction | nda |
|  | Coated aluminum #1 first extraction, 90 min | nda |
|  | Coated aluminum #1 second extraction, 90 min | nda |
|  | Coated aluminum #1 third extraction, 90 min | nda |
|  | Coated aluminum #2 | nda |
|  | Coated aluminum #3 | nda |
|  | Coated aluminum #4 | nda |
|  | Coated aluminum #5 | nda |
|  | Coated aluminum #5 abraided | nda |
|  |  |  |
|  | Coated anodized aluminum #1 first extraction | nda |
|  | Coated anodized aluminum #1 second extraction | nda |
|  | Coated anodized aluminum #1 third extraction | nda |
|  | Coated anodized aluminum #1 first extraction, 90 min | nda |
|  | Coated anodized aluminum #1 second extraction, 90 min | nda |
|  | Coated anodized aluminum #1 third extraction, 90 min | nda |
|  | Coated anodized aluminum #2 | nda |
|  | Coated anodized aluminum #3 | nda |
|  | Coated anodized aluminum #4 | nda |
|  | Coated anodized aluminum #5 | nda |
|  | Coated anodized aluminum #5 abraided | nda |
|  |  |  |
|  | Stainless steel control #1 | nda |
| anot detected, detection limit is approx. 100 pg cm-2 | | |

**Table 5 Detailed laboratory sike recovery data for water extraction**

| Sample identification | Laboratory  Spike Recovery PFOA (ng L-1) | % recovery |
| --- | --- | --- |
| 376603-1 Stainless steel control #1, 1st aliquot | 500 | 122.0 |
| 376603-2 Stainless steel control #1, 2nd aliquot | 500 | 115.8 |
| 376606-1 Stainless steel control #2, 1st aliquot | 500 | 108.8 |
| 376606-2 Stainless steel control #2, 2nd aliquot | 500 | 116.4 |
| 376609-1 Stainless steel control #3, 1st aliquot | 500 | 101.1 |
| 376609-2 Stainless steel control #3, 2nd aliquot | 500 | 130.0 |
| 376612-1 Stainless steel control #4, 1st aliquot | 500 | 107.4 |
| 376612-2 Stainless steel control #4, 2nd aliquot | 500 | 108.2 |
| 376615-1 Stainless steel control #5, 1st aliquot | 500 | 111.0 |
| 376615-2 Stainless steel control #5, 2nd aliquot | 500 | 105.6 |
| 376616 Deionized water control | 500 | 104.0 |
| 610030 Stainless steel control #1, 1st aliquot | 500 | 103.0 |
| 610035 Stainless steel control #1, 2nd aliquot | 500 | 110.4 |
| 610060 Coated aluminum #1, 1st aliquot | 500 | 106.4 |
| 610065 Coated aluminum #1, 2nd aliquot | 500 | 101.6 |
| 610090 Coated aluminum #2, 1st aliquot | 500 | 112.2 |
| 610095 Coated aluminum #2, 2nd aliquot | 500 | 109.6 |
| 610120 Coated aluminum #3, 1st aliquot | 500 | 107.6 |
| 610125 Coated aluminum #3, 2nd aliquot | 500 | 107.6 |
| 610150 Stainless steel control #2, 1st aliquot | 500 | 104.8 |
| 610155 Stainless steel control #2, 2nd aliquot | 500 | 104.2 |
| 611030 Stainless steel control #3, 1st aliquot | 500 | 110.6 |
| 611035 Stainless steel control #3, 2nd aliquot | 500 | 103.6 |
| 611060 Coated aluminum #4, 1st aliquot | 500 | 109.2 |
| 615030 Stainless steel control #4, 1st aliquot | 500 | 77.0 |
| 615035 Stainless steel control #4, 2nd aliquot | 500 | 71.6 |
| 615060 Coated aluminum #5, 1st aliquot | 500 | 103.8 |
| 615065 Coated aluminum #5, 2nd aliquot | 500 | 71.6 |
| 615090 Stainless steel control #5, 1st aliquot | 500 | 78.2 |
| 615095 Stainless steel control #5, 2nd aliquot | 500 | 101.8 |
| 615120 Coated aluminum #6, 1st aliquot | 500 | 109.9 |
| 615125 Coated aluminum #6, 2nd aliquot | 500 | 108.2 |
| 615150 Stainless steel control #1, 1st aliquot | 500 | 74.4 |
| 615155 Stainless steel control #2, 2nd aliquot | 500 | 102.8 |
| 615160 Deionized water control | 500 | 88.2 |
| Detection limit is approx. 10 ppt, quantification limit is 50 ppt | |  |
